# Supplementary material
Source: PubMed Central journal article supplement (PMC1599899)

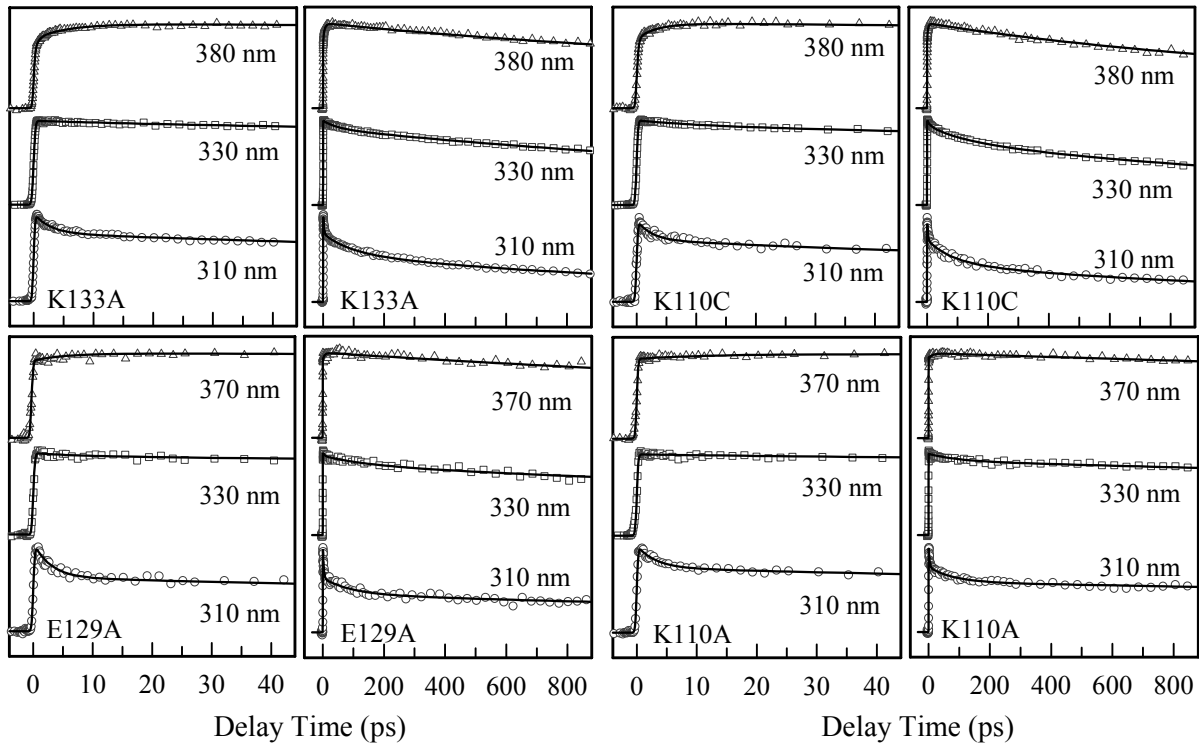

Supplement: pnas_0606235103_1.pdf [file pnas_0606235103_1.pdf]

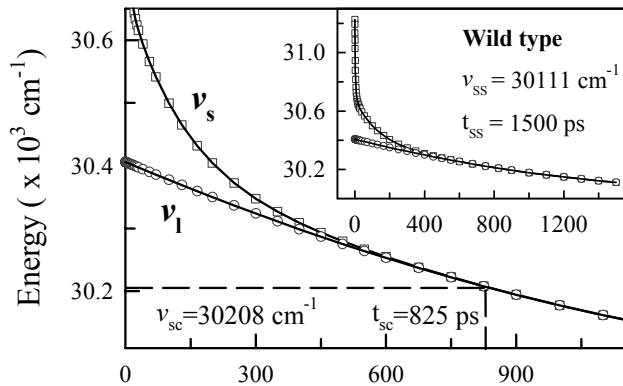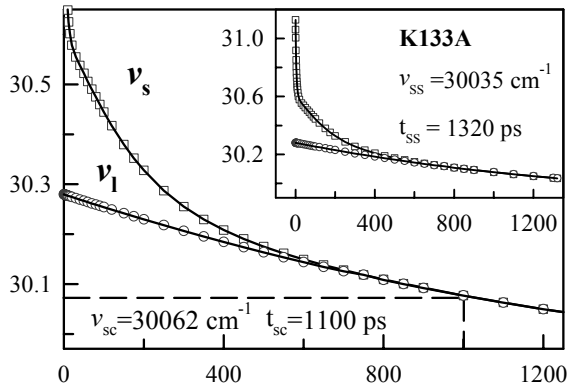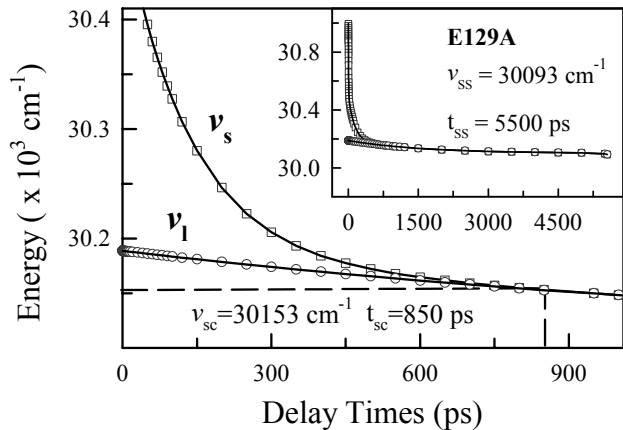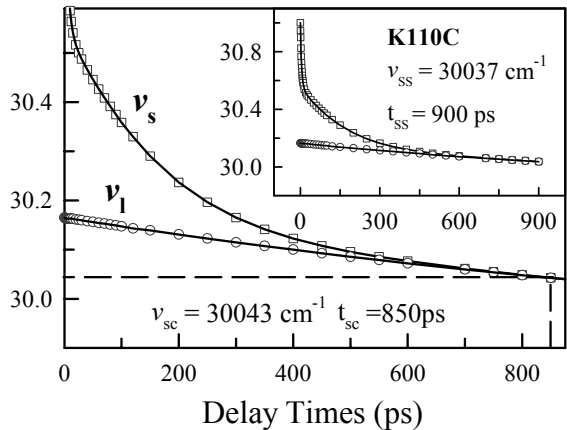

Supplement: pnas_0606235103_2.pdf [file pnas_0606235103_2.pdf]

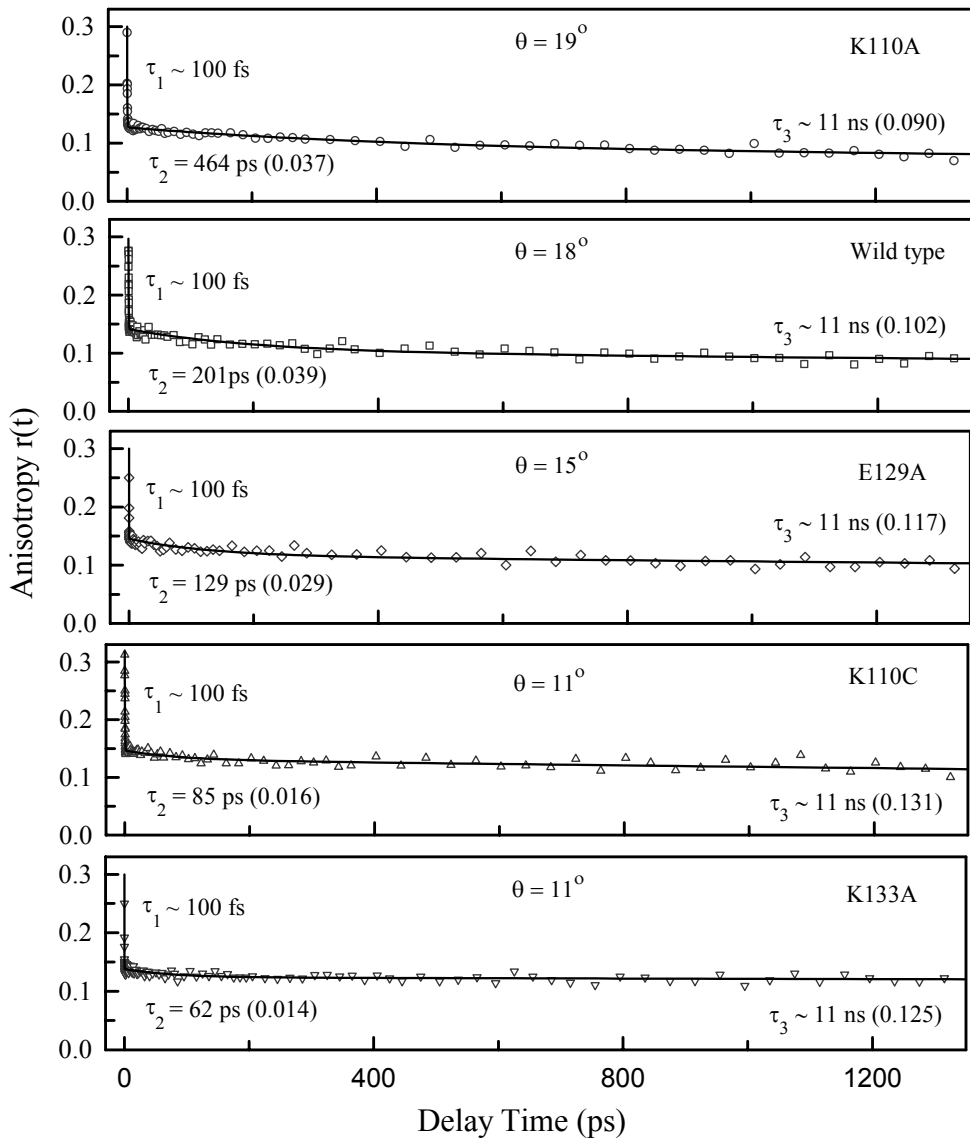

Supplement: pnas_0606235103_3.pdf [file pnas_0606235103_3.pdf]
